# Supplementary material for: Estimation of hepatitis C prevalence in the Punjab province of Pakistan: A retrospective study on general population
Source: PLOS journal article supplement (doi:10.1371/journal.pone.0214435), 2019-04-03

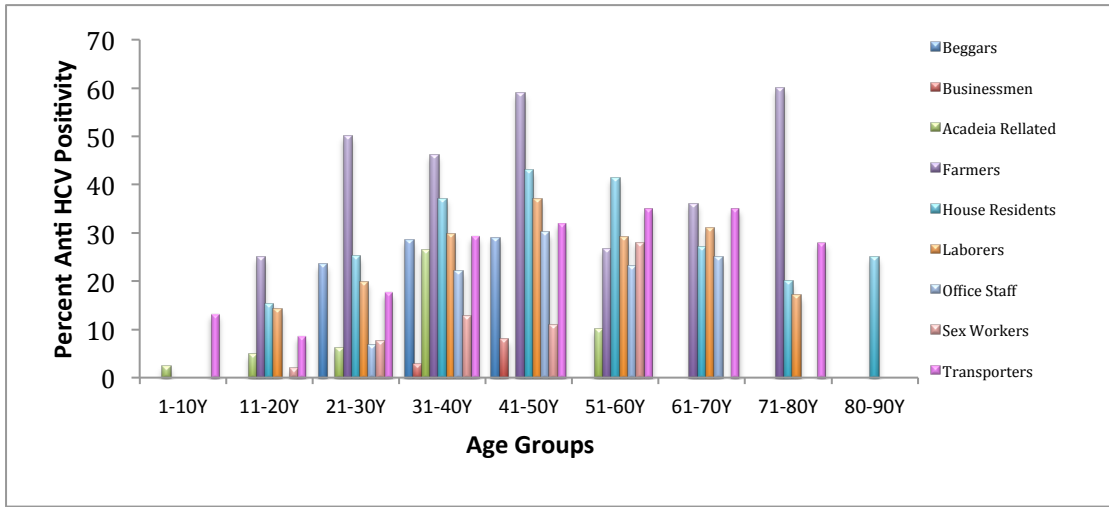

Supplement: S1 (10.1371/journal.pone.0214435.s001) [file journal.pone.0214435.s001]
